# Supplementary material for: Three CoS/CoO microspheres and their mixed matrix membranes for the highly efficient photocatalytic degradation of methyl blue
Source: Royal Society of Chemistry journal article supplement (doi:10.1039/d4ra03261f), 2024-01-01
Supplement: d4ra03261f1.pdf [file d4ra03261f1.pdf]

## Three CoS/CoO microspheres and its mixed matrix membrane for the highly efficient photocatalytic degradation of methyl blue

Yuping Huo<sup>a,b</sup>, Tanlai Yu<sup>a,b\*</sup>, Yueyuan Xue<sup>a,b</sup>, Guoshuai Zhang<sup>a,b</sup>, Shengxin Song<sup>a</sup>,  
Yonghua Shao<sup>a</sup>, Xiaojing Han<sup>a,b</sup>

<sup>a</sup>Department of Chemical and Materials Engineering, Lyuliang University, Lishi Shanxi 033001, China

<sup>b</sup>Institute of New Carbon-based Materials and Zero-carbon and Negative-carbon Technology, Lyuliang University, Lishi Shanxi 033001, China

### Supporting Information (SI)

XRD patterns of **3-MMM** before and after recycling (Fig. S1); XPS spectra of **3-MMM**. (a) The survey spectra of **3-MMM**; (b) Co 2p XPS spectra; (c) O 1s XPS spectra; (d) S 2p XPS spectra (Fig. S2); SEM and EDS mappings of **3-MMM** (Fig. S3); Particle size analysis of **1-3** (Fig. S4); N<sub>2</sub> adsorption-desorption isotherm diagram of **1**, **2** and **3** at 77 K (Fig. S5); UV-vis spectra at different times for MB in the presence of **1**, **2**, **3**, and **3-MMM**, respectively (Fig. S6); UV-vis spectra for MB in the presence of **1**, **2**, **3**, and **3-MMM** under metal halide lamp irradiation (Fig. S7); Adsorption and photocatalytic degradation of methyl blue solution by no catalyst, **PVDF-M**, **3-MMM** and **3**, respectively (Fig. S8); Total decontamination efficiency of methyl blue contrast. (a) no catalyst; (b) **PVDF-M**; (c) **3-MMM**; (d) **3** (Fig. S9); Comparison of the photocatalytic degradation behavior of MB by **3**, **3-MMM** and some reported photocatalysts (Table S1).

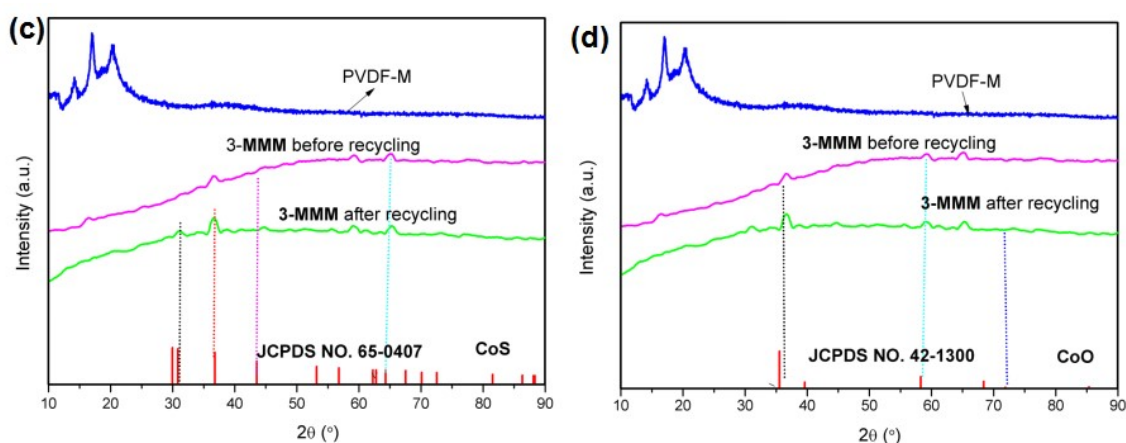

Fig. S1 XRD patterns of **3-MMM** before and after recycling.

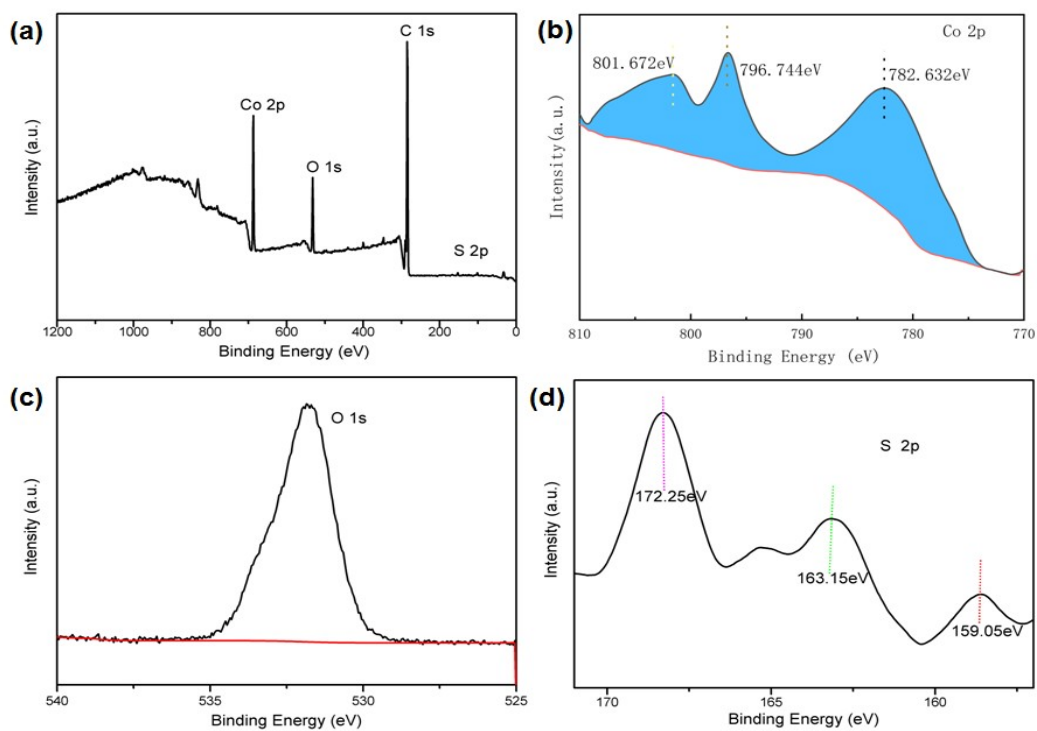

Fig. S2 XPS spectra of 3-MMM. (a) The survey spectra of 3-MMM; (b) Co 2p XPS spectra; (c) O 1s XPS spectra; (d) S 2p XPS spectra.

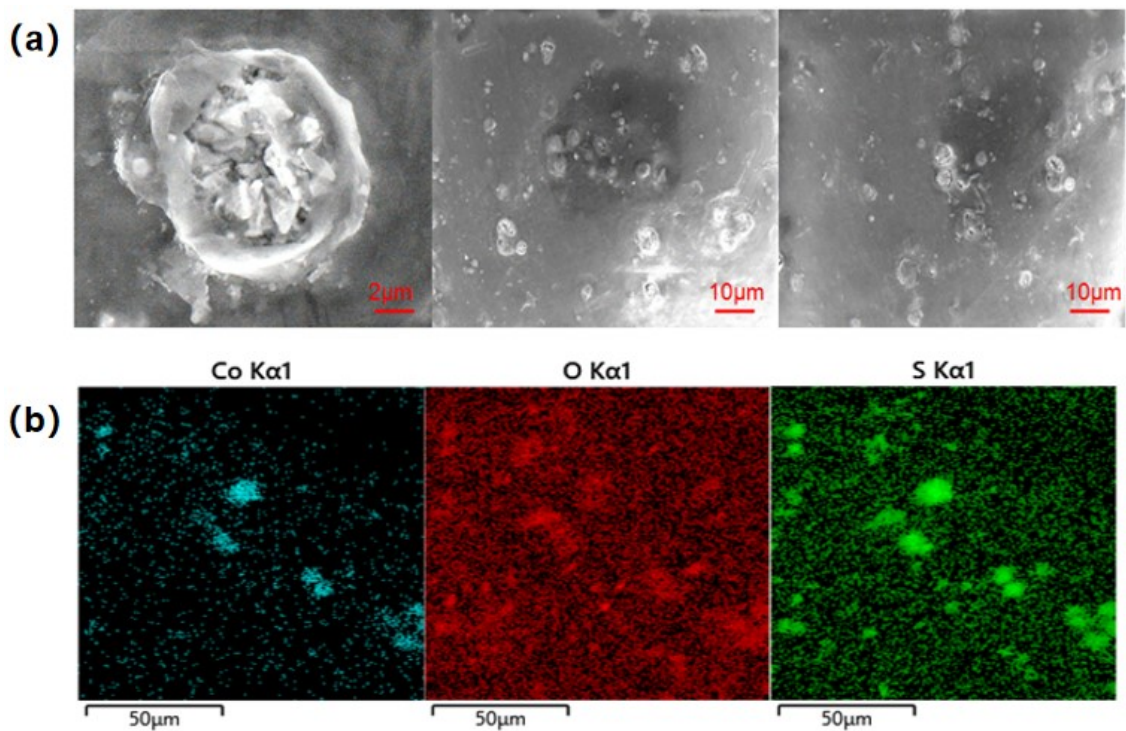

Fig. S3 (a) and (b) are SEM and EDS mappings of 3-MMM respectively.

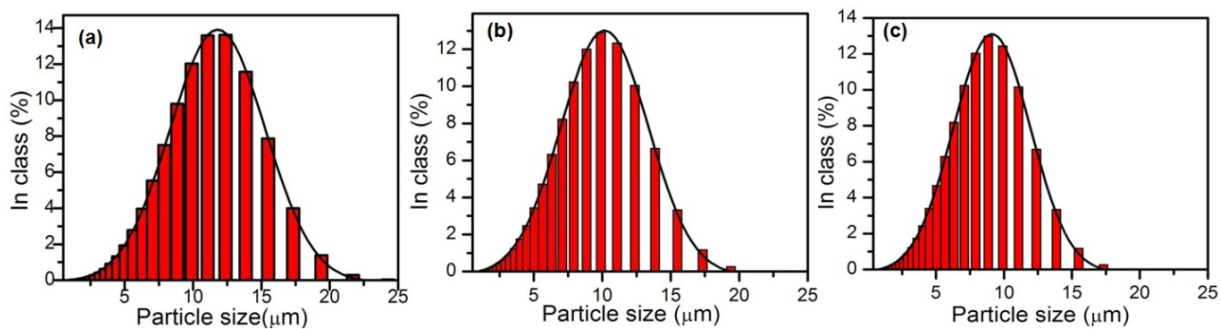

Fig. S4 Particle size analysis of **1** (a), **2** (b) and **3**(c), respectively.

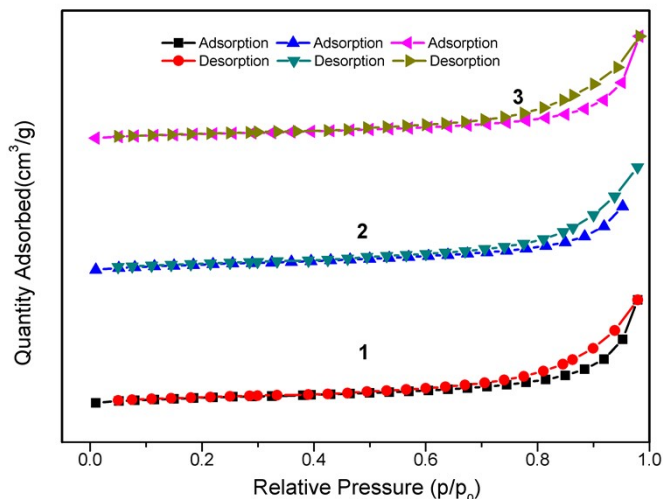

Fig. S5 N<sub>2</sub> adsorption-desorption isotherm diagram of **1**, **2** and **3** at 77 K

Fig. S6 UV-vis spectra at different times for MB in the presence of **1**, **2**, **3**, and **3-MMM**, respectively.

Fig. S7 UV-vis spectra for MB in the presence of **1**, **2**, **3**, and **3-MMM** under metal halide lamp irradiation.

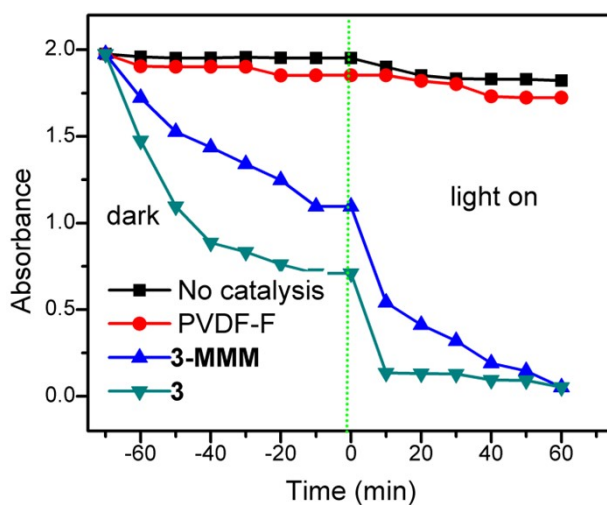

Fig. S8 Adsorption and photocatalytic degradation of methyl blue solution by no catalyst, PVDF-Membrane (PVDF-M), 3-MMM and 3, respectively.

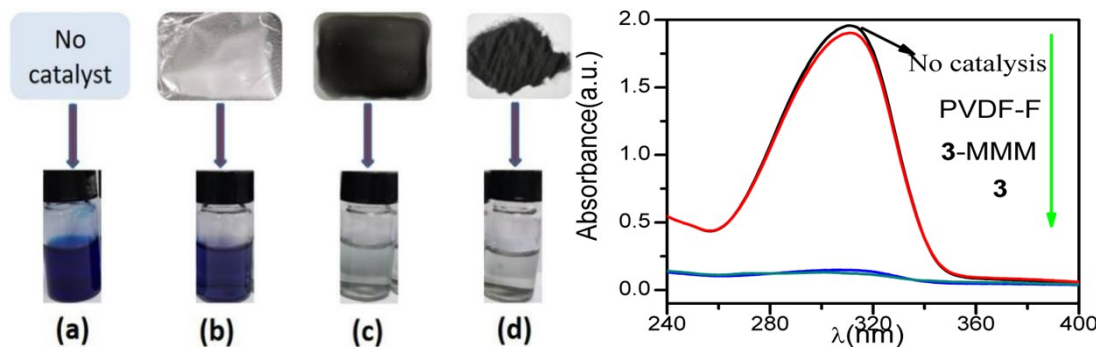

Fig. S9 Total decontamination efficiency of methyl blue contrast. (a) no catalyst; (b) PVDF-Membrane (PVDF-M); (c) 3-MMM; (d) 3.

Table S1. Comparison of the photocatalytic degradation behavior of MB by 3, 3-MMM and some reported photocatalysts

| Type of photocatalyst                       | Photocatalyst dosage (mg) | MB concentration (mg/L) | Solution Volume (mL) | Irradiation time (min) | Photocatalytic Degradation rate(%) | Cycle number (time) | Literature sources     |
|---------------------------------------------|---------------------------|-------------------------|----------------------|------------------------|------------------------------------|---------------------|------------------------|
| 3                                           | 20                        | 80                      | 20                   | 60                     | 97.3%                              | 12                  | This work              |
| 3-MMM                                       | 20                        | 80                      | 20                   | 60                     | 97.34%                             | 12                  | This work              |
| 2% $\text{C}/\text{TiO}_2$                  | 100                       | 20                      | 100                  | 129                    | —                                  | —                   | (Alkorbi et al., 2022) |
| ZnO nanorods/C-dots                         | —                         | 80                      | 20                   | 70                     | 74.98%                             | —                   | (Roza et al., 2020)    |
| $\text{Co}_3\text{O}_4$ nanoparticle        | 5                         | 50                      | 20                   | 180                    | 91.7%                              | —                   | (Dhiman et al., 2022)  |
| $\text{Cu}_2\text{O}$ -Based Photocatalysis | 60                        | 50                      | 100                  | 120                    | 79%                                | —                   | (Zhou et al., 2022)    |
| Al-doped ZnO thin films                     | —                         | 80                      | 10                   | 45                     | 79.9%                              | —                   | (Roza et al., 2020)    |

### References:

- Alkorbi, A.S., Asif Javed. H.M., Hussain. S., Latif, Sana., Shabir Mahr,M., Mustafa, M. S., Alsaiari, R., Alhemiary, N., 2022. Solar light-driven photocatalytic degradation of methyl blue by carbon-doped  $\text{TiO}_2$  nanoparticles, *Opt. Mater.*127, 112259. <https://doi.org/10.1016/j.optmat.2022.112259>.
- Dihom, H.R., Al-Shaibani, M.M., Radin Mohamed, R.M.S., Al-Gheethi, A.A., Sharma, A., Khamidun, M.H.B., 2022. Photocatalytic degradation of disperse azo dyes in textile wastewater using green zinc oxide nanoparticles synthesized in plant extract: A critical review, *J. Water Process Eng.* 47. <https://doi.org/10.1016/j.jwpe.2022.102705>.
- Roza, L., Fauzia, V., M.Y.A., 2020. Influence of Multilayer Al-Doped ZnO Thin Film on Photocatalytic Degradation of Methyl Blue, *Sains Malaysiana.* 12, 3089-3095. <http://dx.doi.org/10.17576/jsm-2020->

4912-21.

Roza, L., Fauzia, V., Rahman, M.Y.A., Isnaeni, I., Putro, P.A., 2020. ZnO nanorods decorated with carbon nanodots and its metal doping as efficient photocatalyst for degradation of methyl blue solution, Opt Mater. 109,110360. <https://doi.org/10.1016/j.optmat.2020.110360>.

Zhou, M., Ji, C., Ji, F., Chen, M., Zhong, Z., Xing, W., 2022. Micro-Octahedron Cu<sub>2</sub>O-Based Photocatalysis-Fenton for Organic Pollutant Degradation: Proposed Coupling Mechanism in a Membrane Reactor, Ind Eng Chem Res, 61, 7255-7265. <https://doi.org/10.1021/acs.iecr.2c00654>.
